# Supplementary material
Source: PubMed Central journal article supplement (PMC3278733)

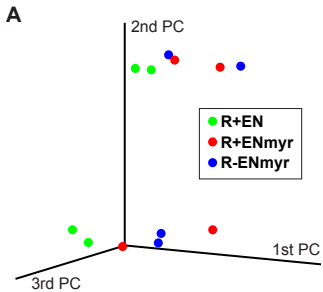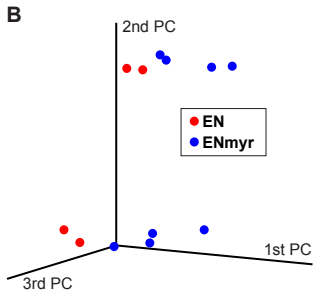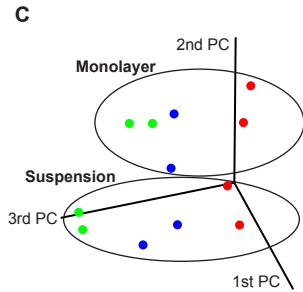

Supplement: cdd2011119x1.pdf [file cdd2011119x1.pdf]

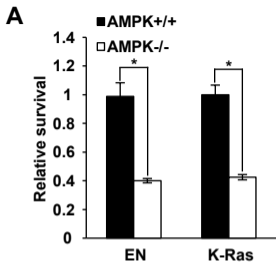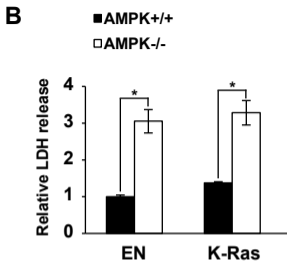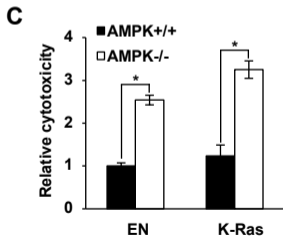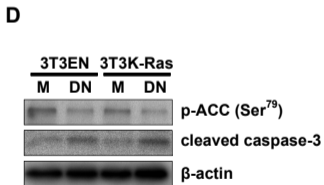

Supplement: cdd2011119x2.pdf [file cdd2011119x2.pdf]

**A**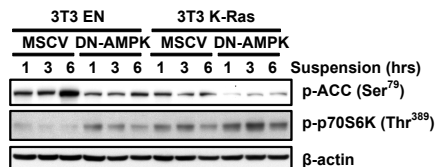**B**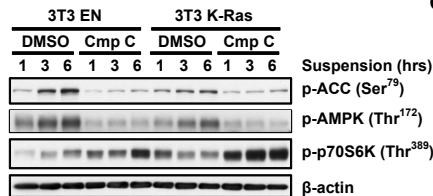**C**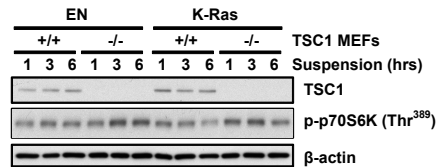**D**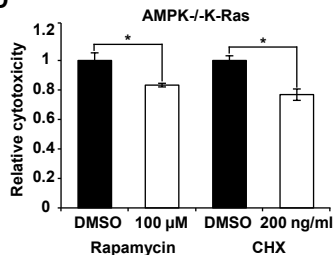**E**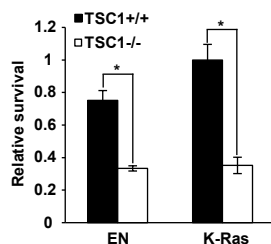**F**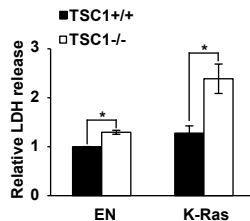**G**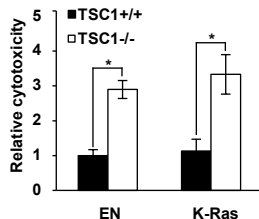**H**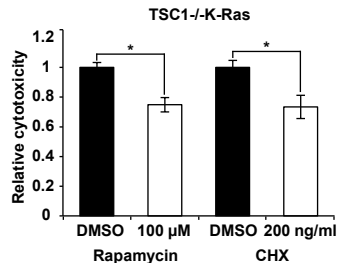

Supplement: cdd2011119x3.pdf [file cdd2011119x3.pdf]

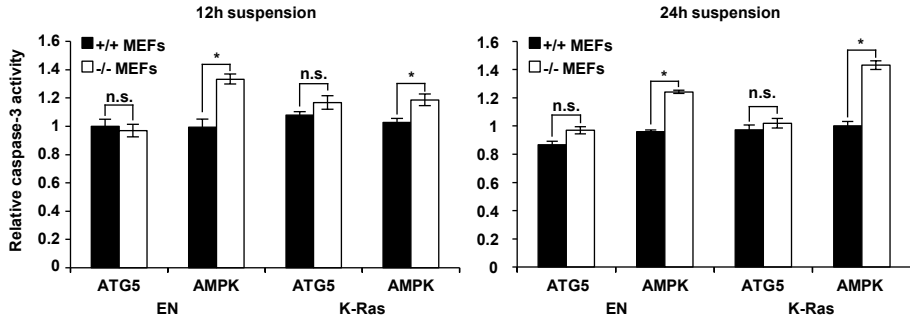

Supplement: cdd2011119x4.pdf [file cdd2011119x4.pdf]

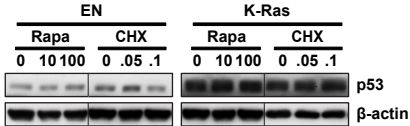

Supplement: cdd2011119x5.pdf [file cdd2011119x5.pdf]
